# Supplementary material for: Genome-wide DNA methylation analysis of the porcine hypothalamus-pituitary-ovary axis
Source: PubMed Central journal article supplement (PMC5487323; doi:10.1038/s41598-017-04603-x), 2017-06-27
Supplement: 41598_2017_4603_MOESM1_ESM.pdf [file 41598_2017_4603_MOESM1_ESM.pdf]

**Genome-wide DNA methylation analysis of the porcine hypothalamus-pituitary-ovary axis**

**Xiao-Long Yuan<sup>1,2+</sup>, Zhe Zhang<sup>1+</sup>, Bin Li<sup>1</sup>, Ning Gao<sup>1,3</sup>, Hao Zhang<sup>1</sup>, Per Torp Sangild<sup>2</sup> and  
Jia-Qi Li<sup>1\*</sup>**

<sup>1</sup>Guangdong Provincial Key Lab of Agro-Animal Genomics and Molecular Breeding, National Engineering Research Centre for Breeding Swine Industry, College of Animal Science, South China Agricultural University, Guangzhou, Guangdong, China

<sup>2</sup>Section of Comparative Pediatrics and Nutrition, Department of Veterinary Clinical and Animal Sciences, University of Copenhagen, Frederiksberg, Denmark

<sup>3</sup>Department of Animal Sciences, Georg-August University, Albrecht Thaer-Weg 3, Göttingen, Germany

\*Corresponding authors: Prof. Jia-Qi Li, E-mail: [jqli@scau.edu.cn](mailto:jqli@scau.edu.cn)

<sup>†</sup>These authors contributed equally to this work.

**Table S1 | Average methylation levels of different genomic features in HPO methylomes**

|                    | CpG methylation level |           |        | CpH methylation level |           |       |
|--------------------|-----------------------|-----------|--------|-----------------------|-----------|-------|
|                    | Hypothalamus          | Pituitary | Ovary  | Hypothalamus          | Pituitary | Ovary |
| <b>Genome</b>      | 57.62%                | 55.60%    | 55.44% | 0.79%                 | 0.61%     | 0.55% |
| <b>Upstream</b>    | 30.45%                | 29.83%    | 28.74% | 0.59%                 | 0.58%     | 0.49% |
| <b>Exon</b>        | 50.06%                | 48.81%    | 48.74% | 0.60%                 | 0.68%     | 0.49% |
| <b>Intron</b>      | 68.22%                | 65.75%    | 66.16% | 0.82%                 | 0.60%     | 0.57% |
| <b>Downstream</b>  | 61.12%                | 58.96%    | 58.12% | 0.71%                 | 0.57%     | 0.53% |
| <b>Intergenic</b>  | 61.79%                | 59.33%    | 59.17% | 0.87%                 | 0.62%     | 0.56% |
| <b>CGI</b>         | 36.88%                | 36.35%    | 35.81% | 0.56%                 | 0.57%     | 0.49% |
| <b>CGI shores</b>  | 64.96%                | 62.43%    | 61.63% | 0.78%                 | 0.63%     | 0.55% |
| <b>CGI shelves</b> | 75.68%                | 72.42%    | 72.11% | 0.85%                 | 0.63%     | 0.56% |

**Table S2 | Correlation coefficients between DNA methylation and gene density**

| Correlation Coefficients | CpG methylation                         |                                         |                                         | CpH methylation                         |                                        |                                        |
|--------------------------|-----------------------------------------|-----------------------------------------|-----------------------------------------|-----------------------------------------|----------------------------------------|----------------------------------------|
|                          | Hypothalamus                            | Pituitary                               | Ovary                                   | Hypothalamus                            | Pituitary                              | Ovary                                  |
| <b>Gene density</b>      | -0.079<br>( $P = 9.14 \times 10^{-5}$ ) | -0.073<br>( $P = 2.91 \times 10^{-4}$ ) | -0.079<br>( $P = 1.41 \times 10^{-7}$ ) | -0.19<br>( $P = 2.20 \times 10^{-16}$ ) | -0.03<br>( $P = 1.30 \times 10^{-1}$ ) | -0.11<br>( $P = 1.55 \times 10^{-8}$ ) |

Correlation coefficients were calculated by Pearson's correlation. The DNA methylation and density of genes were quantified per 1 Mb window.

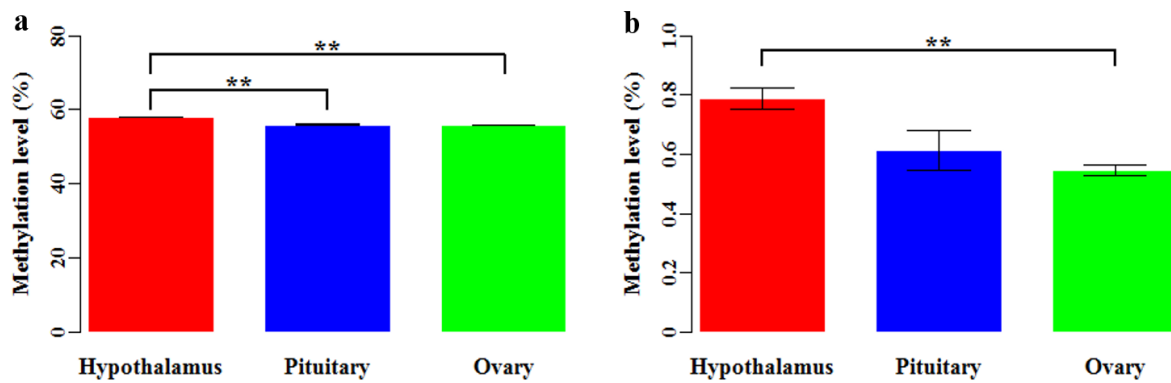

**Figure S1 | Average methylation levels of hypothalamus-pituitary-ovary tissues in the CpG (a) and CpH (b) context. \*\* denotes p-value < 0.01**

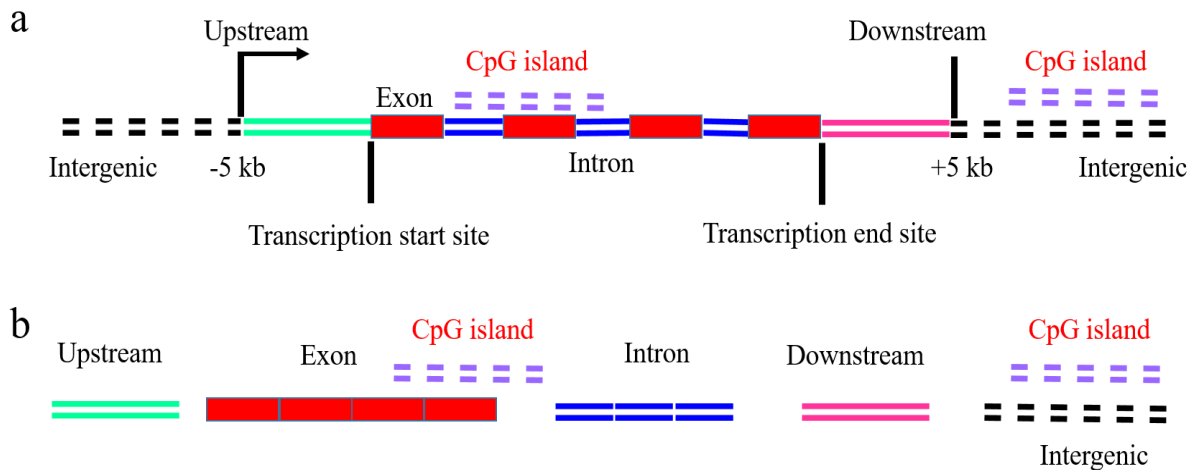

**Figure S2 | Localizations of CGIs based on genic features. a)** Gene locations were integrated and classified into upstream, exon, intron, downstream and intergenic regions. **b)** When more than 50% of a CGI overlapped with a specific genic feature, that CGI was classified with the specific genic feature. For example, when the overlap ratio between a CGI and the upstream genome sequences was greater than 50%, that CGI was defined as an upstream CGI, and the related genes were referred to as the CGI-Upstream genes. When the overlap ratio between a CGI and exons was greater than 50%, that CGI was defined as an exonic CGI, and the related genes were referred to as the CGI-Exon genes

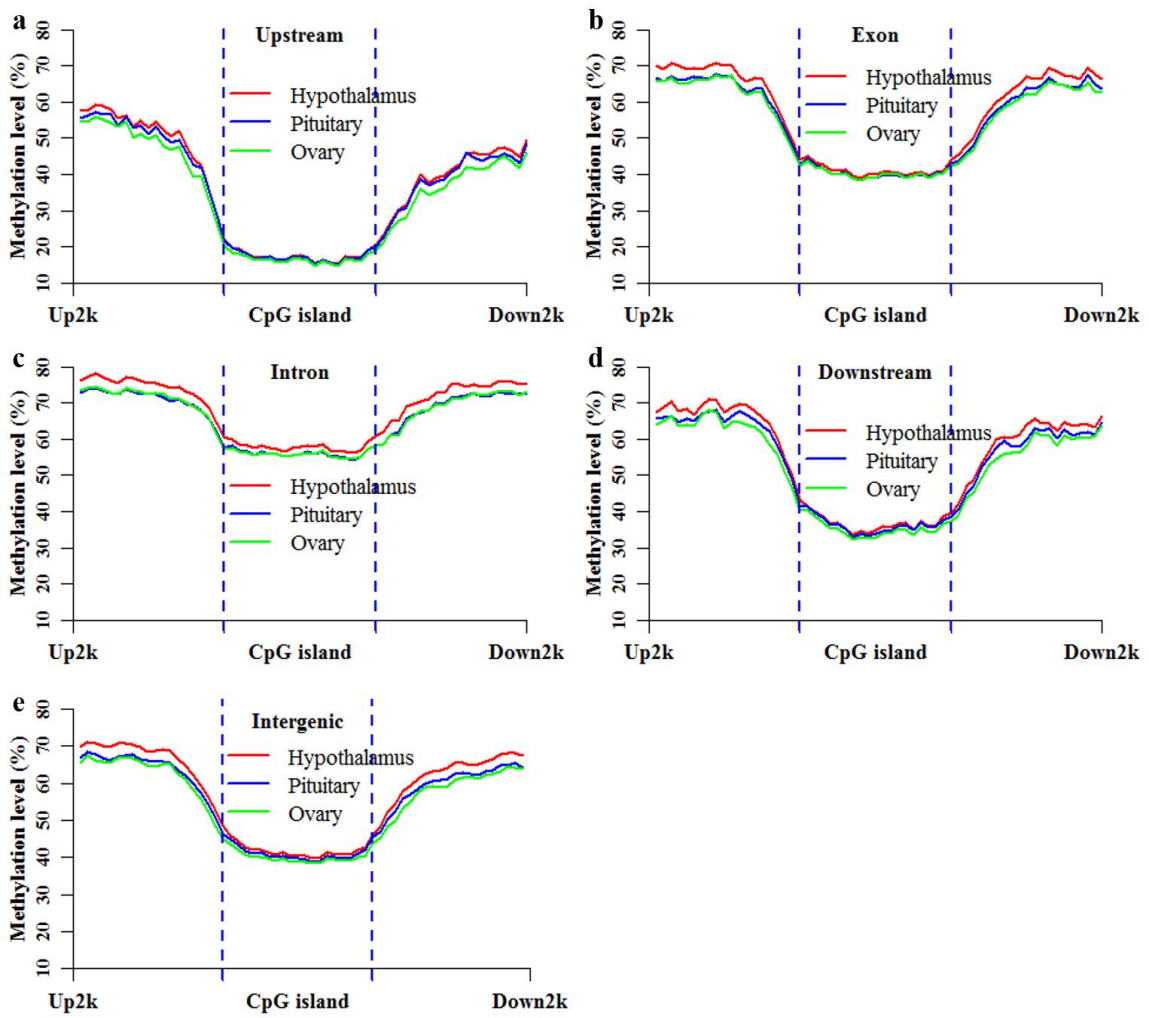

**Figure S3 | Methylation patterns of CGIs located in different genic features in the CpG context.** The methylation patterns of CGIs which located in upstream regions (a), exons (b), introns (c), downstream regions (d) and intergenic regions (e).

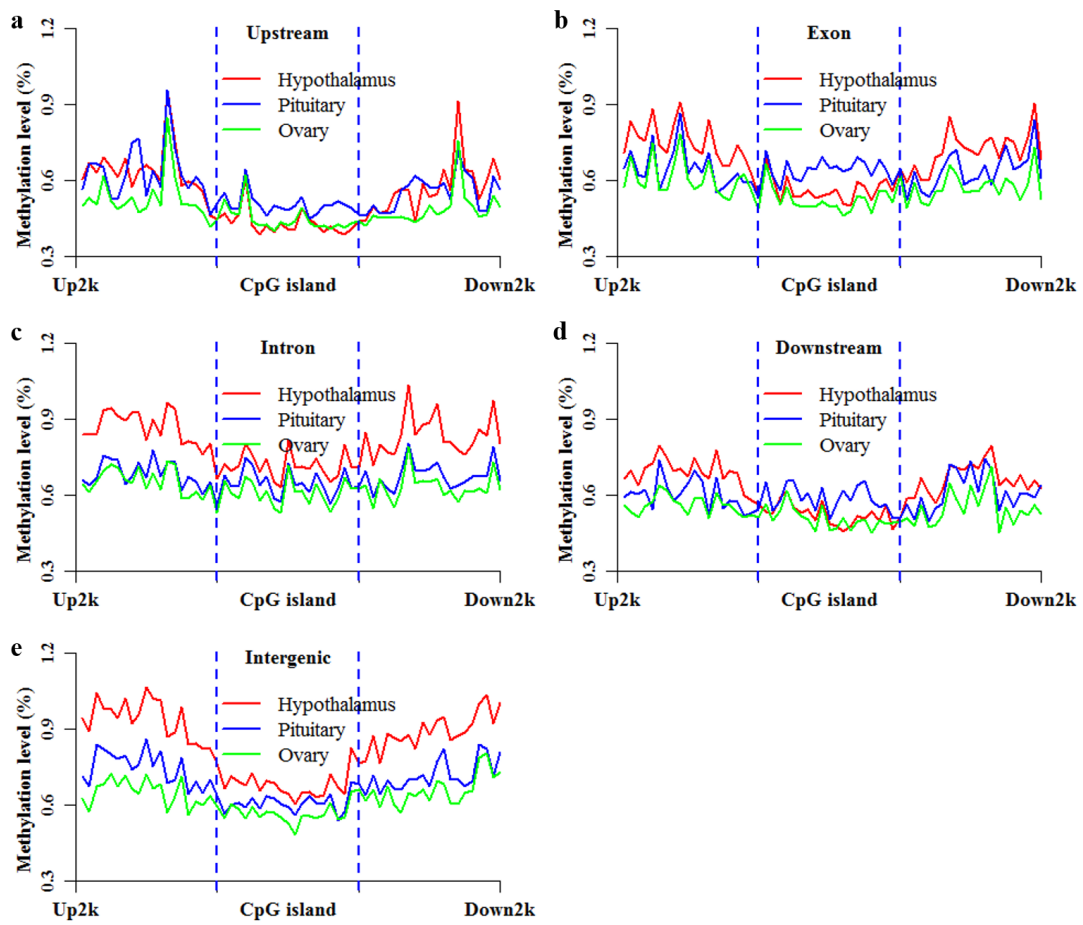

**Figure S4 | Methylation patterns of CGIs located in different genic features in the CpH context.** The methylation patterns of CGIs locating at upstream regions (a), exons (b), introns (c), downstream regions (d) and intergenic regions (e).

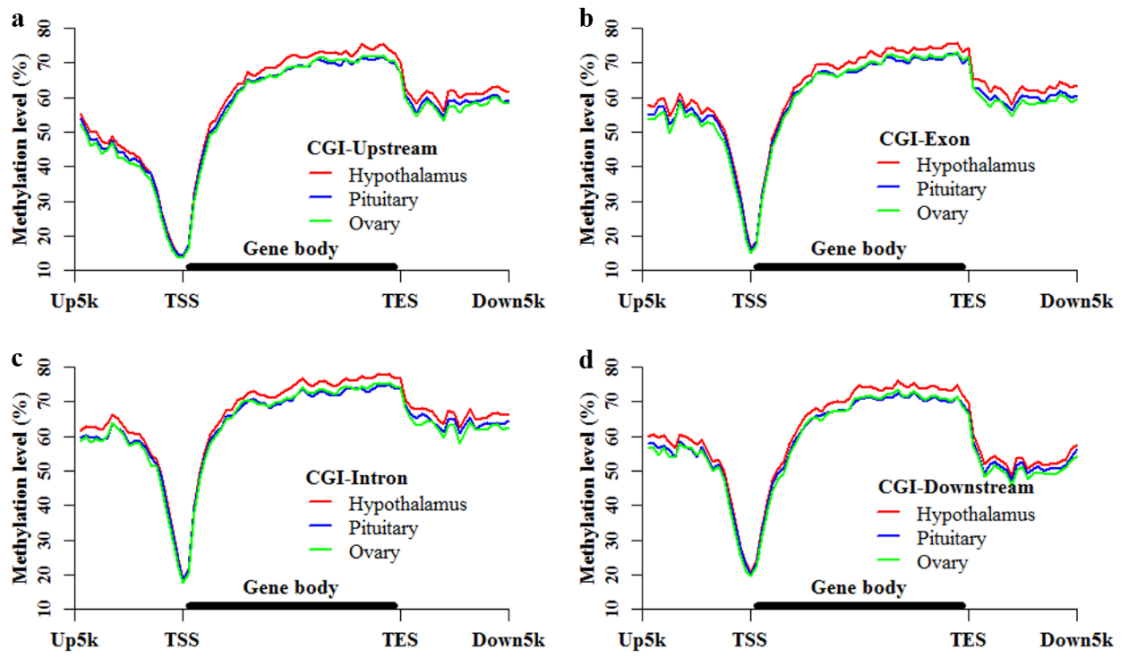

**Figure S5 | Methylation patterns of genes based on different CGI locations in the CpG context.** The methylation patterns of CGI-Upstream (a), CGI-Exon (b), CGI-Intron (c) and CGI-Downstream (d) genes.

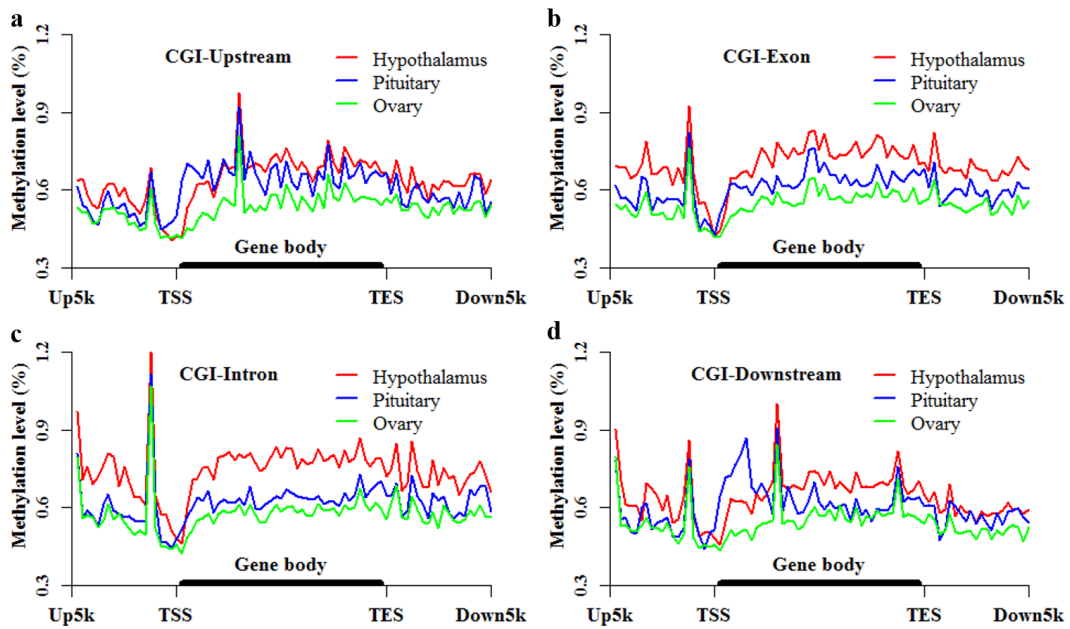

**Figure S6 | Methylation patterns of genes based on different CGI locations in the CpH context.** The methylation patterns of CGI-Upstream (a), CGI-Exon (b), CGI-Intron (c) and CGI-Downstream (d) genes.

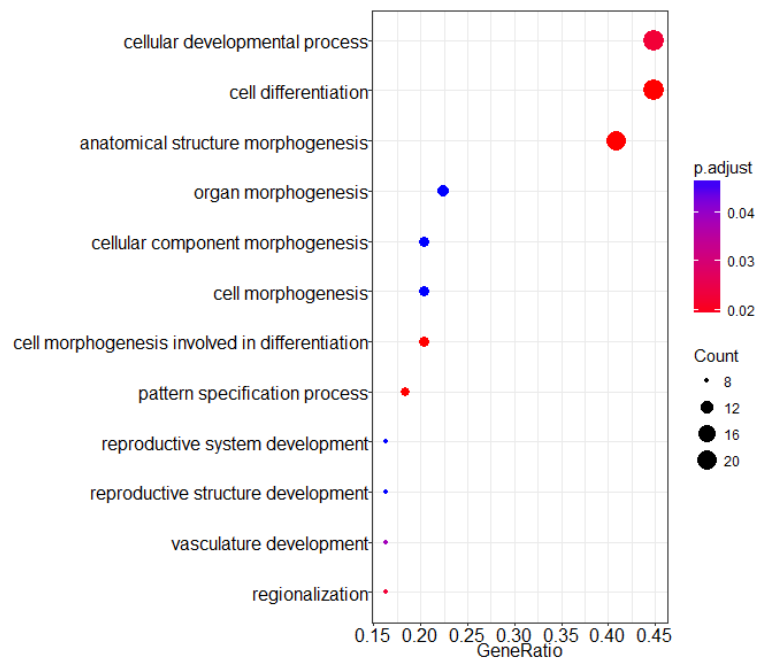

**Figure S7 | Gene ontology enrichment analysis of biological processes**
